# Supplementary material
Source: PubMed Central journal article supplement (PMC5528528)

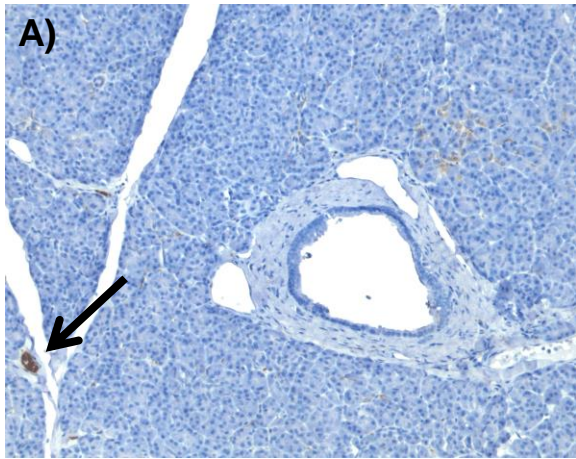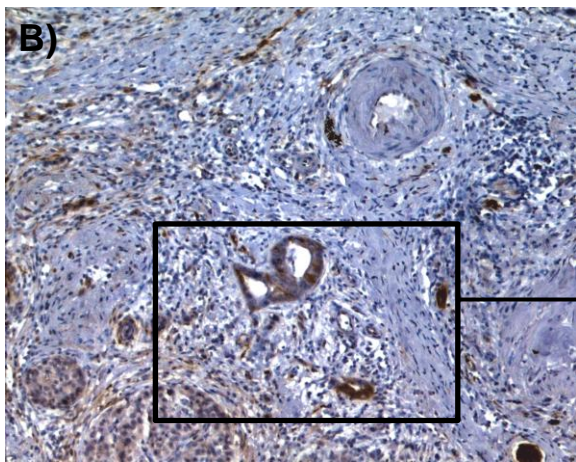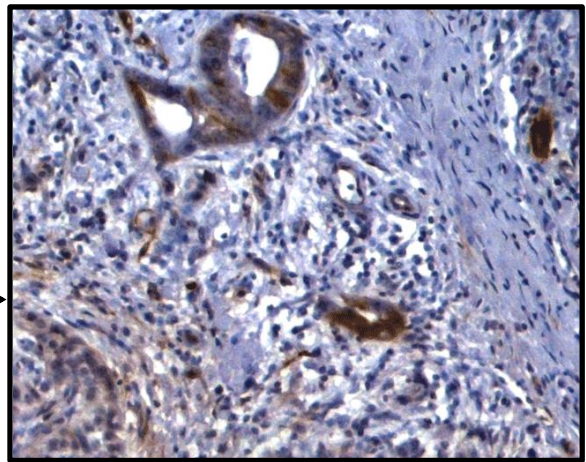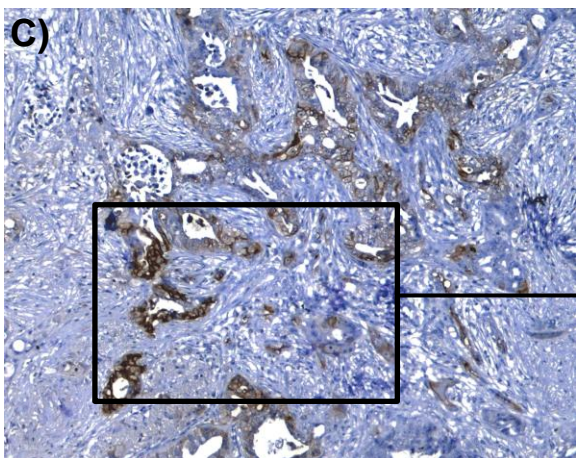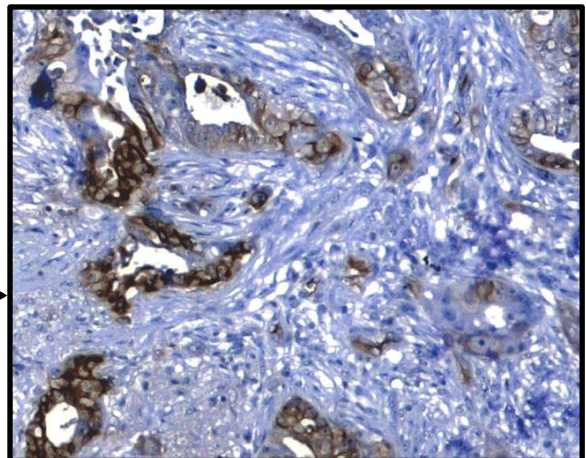

Supplement: MOL2-8-0982-s001.pdf [file MOL2-8-0982-s001.pdf]

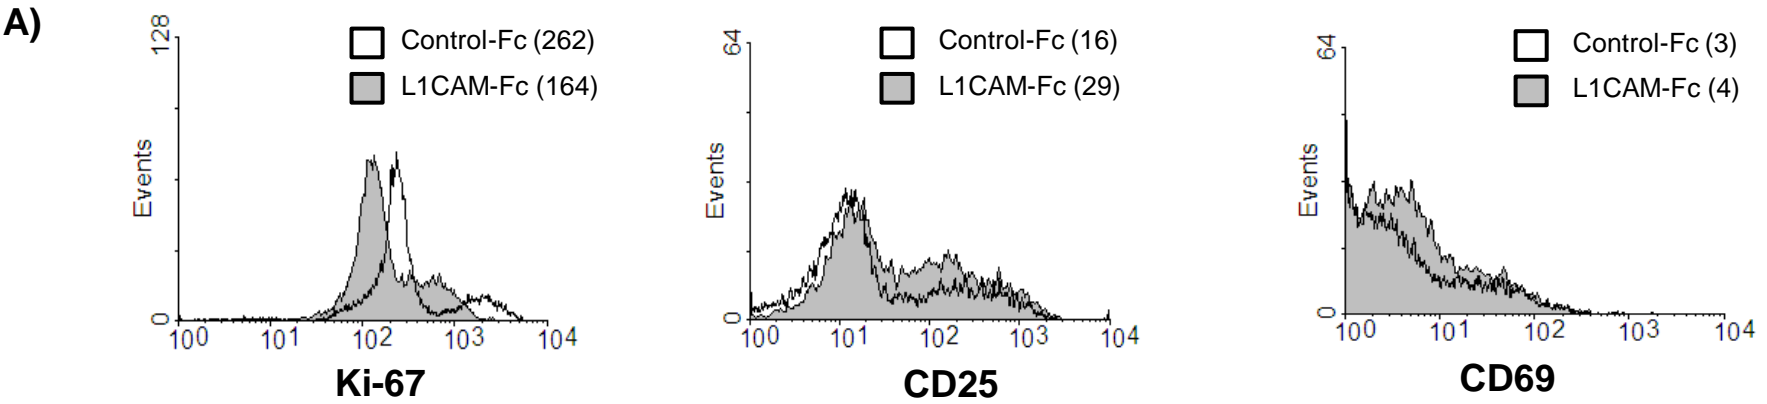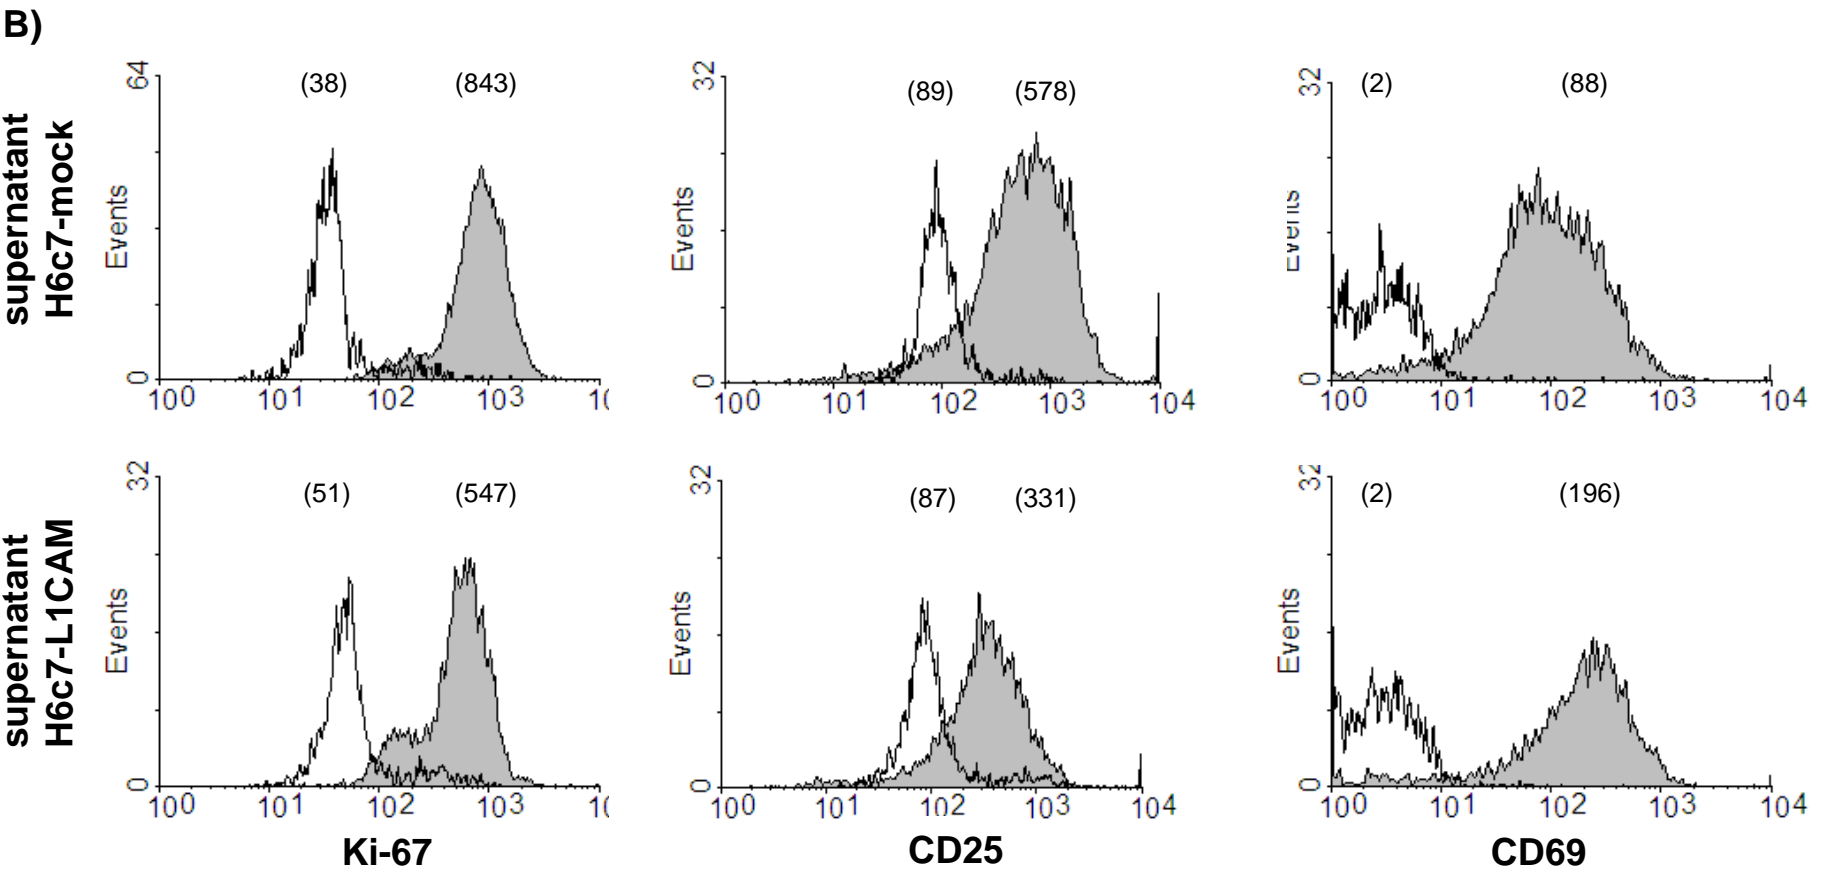

**Supplementary Figure 2**

c)

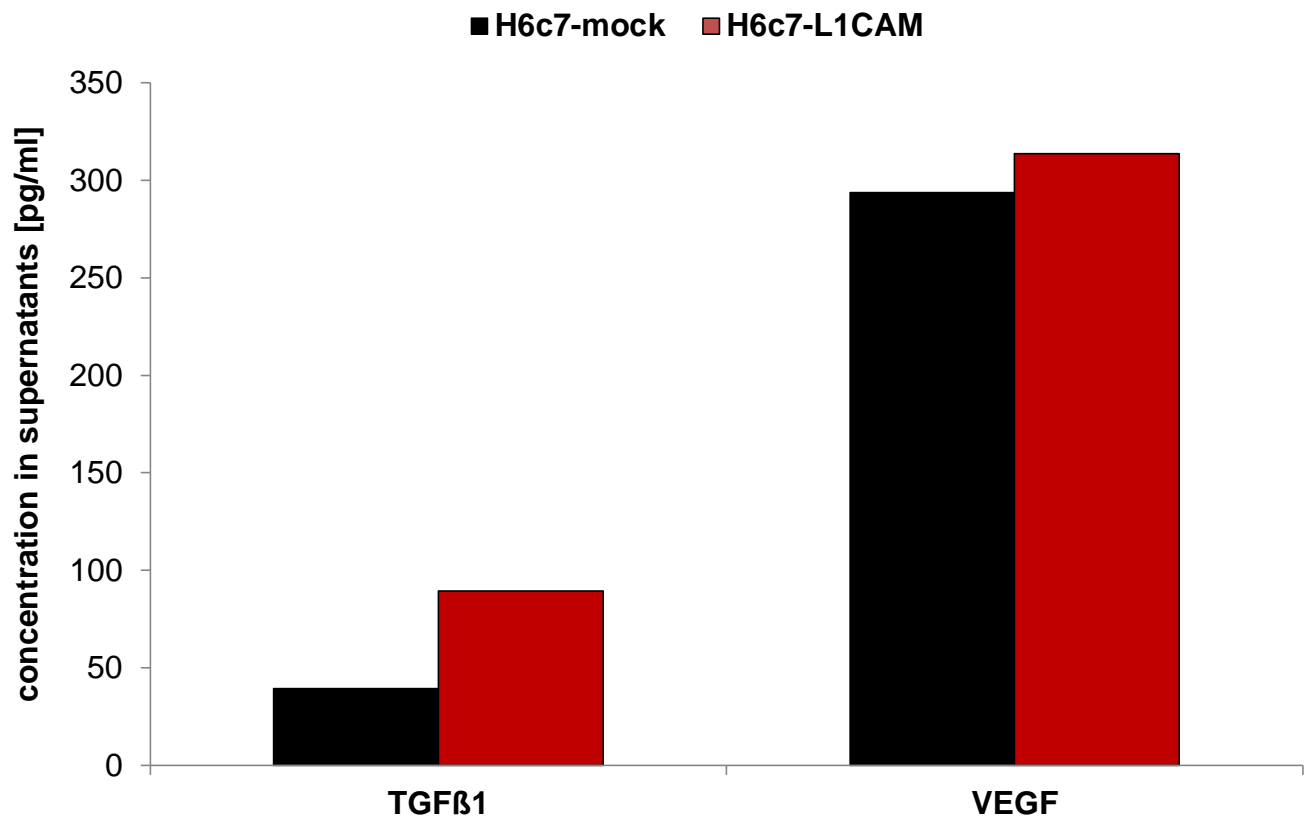

Supplement: MOL2-8-0982-s002.pdf [file MOL2-8-0982-s002.pdf]
